# Supplementary material for: Access to functionalised silver(i) and gold(i) N-heterocyclic carbenes by [2 + 3] dipolar cycloadditions
Source: Royal Society of Chemistry journal article supplement (doi:10.1039/c2dt30249g), 2012-01-01

# Access to Functionalised Silver (I) and Gold(I) *N*-Heterocyclic Carbenes by [2+3] Dipolar Cycloadditions.

by

Audrey Hospital,<sup>a</sup> Clémentine Gibard,<sup>a</sup> Christelle Gaulier,<sup>a</sup> Lionel Nauton,<sup>a,b</sup> Vincent Théry,<sup>a</sup> Malika El-Ghozzi,<sup>a</sup> Daniel Avignant,<sup>a</sup> Federico Cisnetti\*<sup>a</sup> and Arnaud Gautier\*<sup>a,b</sup>

<sup>a</sup> Institut de Chimie de Clermont-Ferrand, Clermont Université, Université Blaise Pascal, F-63000 Clermont-Ferrand, France  
Fax: +33 473 407 717; Tel: +33 473 407 110, E-mail: federico.cisnetti@univ-bpclermont.fr

<sup>b</sup> CNRS, UMR 6296, F-63177 Aubière, CEDEX, France. Fax: +33 473 407 717; Tel: +33 473 407 646; E-mail: arnaud.gautier@univ-bpclermont.fr

## Supporting information

### Contents:

**S1: Crystal packing of 22**

**S2: Selected NMR spectra.**

**S2a: <sup>1</sup>H and <sup>13</sup>C NMR spectra of metallocarbenes.**

**S2b: <sup>1</sup>H, <sup>13</sup>C, COSY and HSQC spectra of cyclooctyne adducts.**

**S3: Representation of the calculated transition states.**

## S1: Crystal packing of 22

Packing of gold complex 22 showing azide–azide distances. Ellipsoids were drawn at 50% probability level and H atoms omitted for clarity

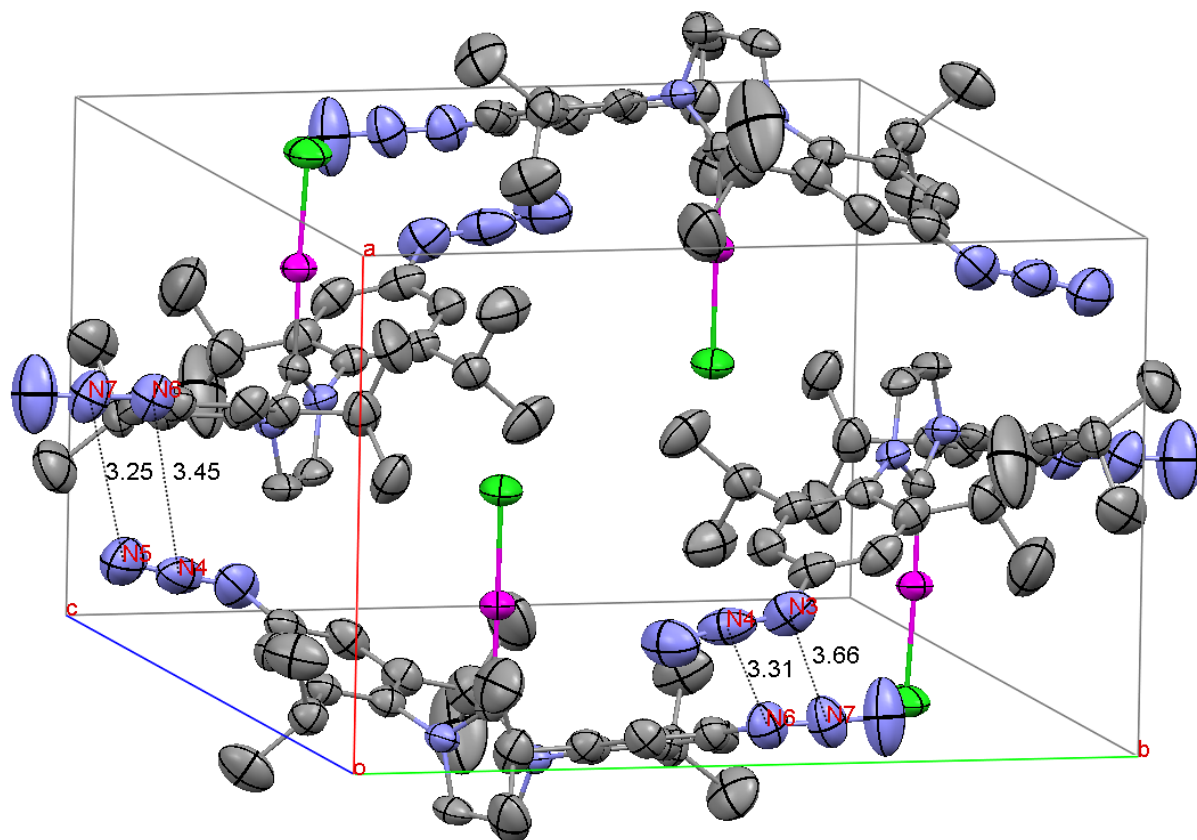

## S2. Selected NMR spectra.

### S2a: $^1\text{H}$ and $^{13}\text{C}$ NMR spectra of metallocarbenes

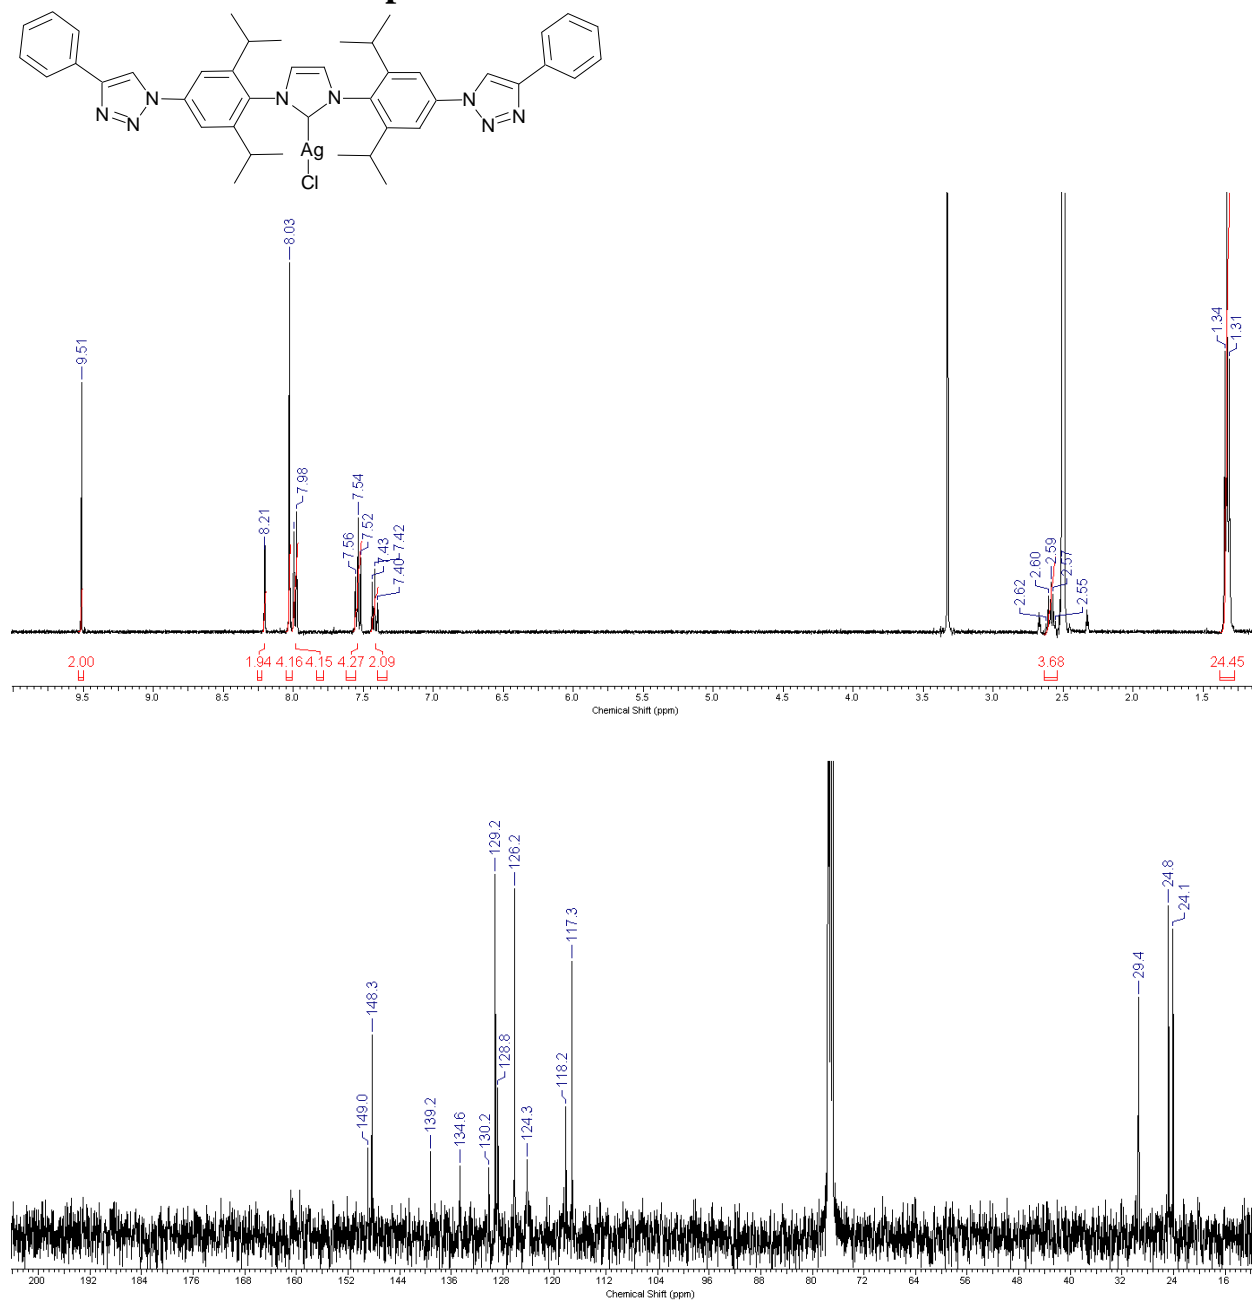

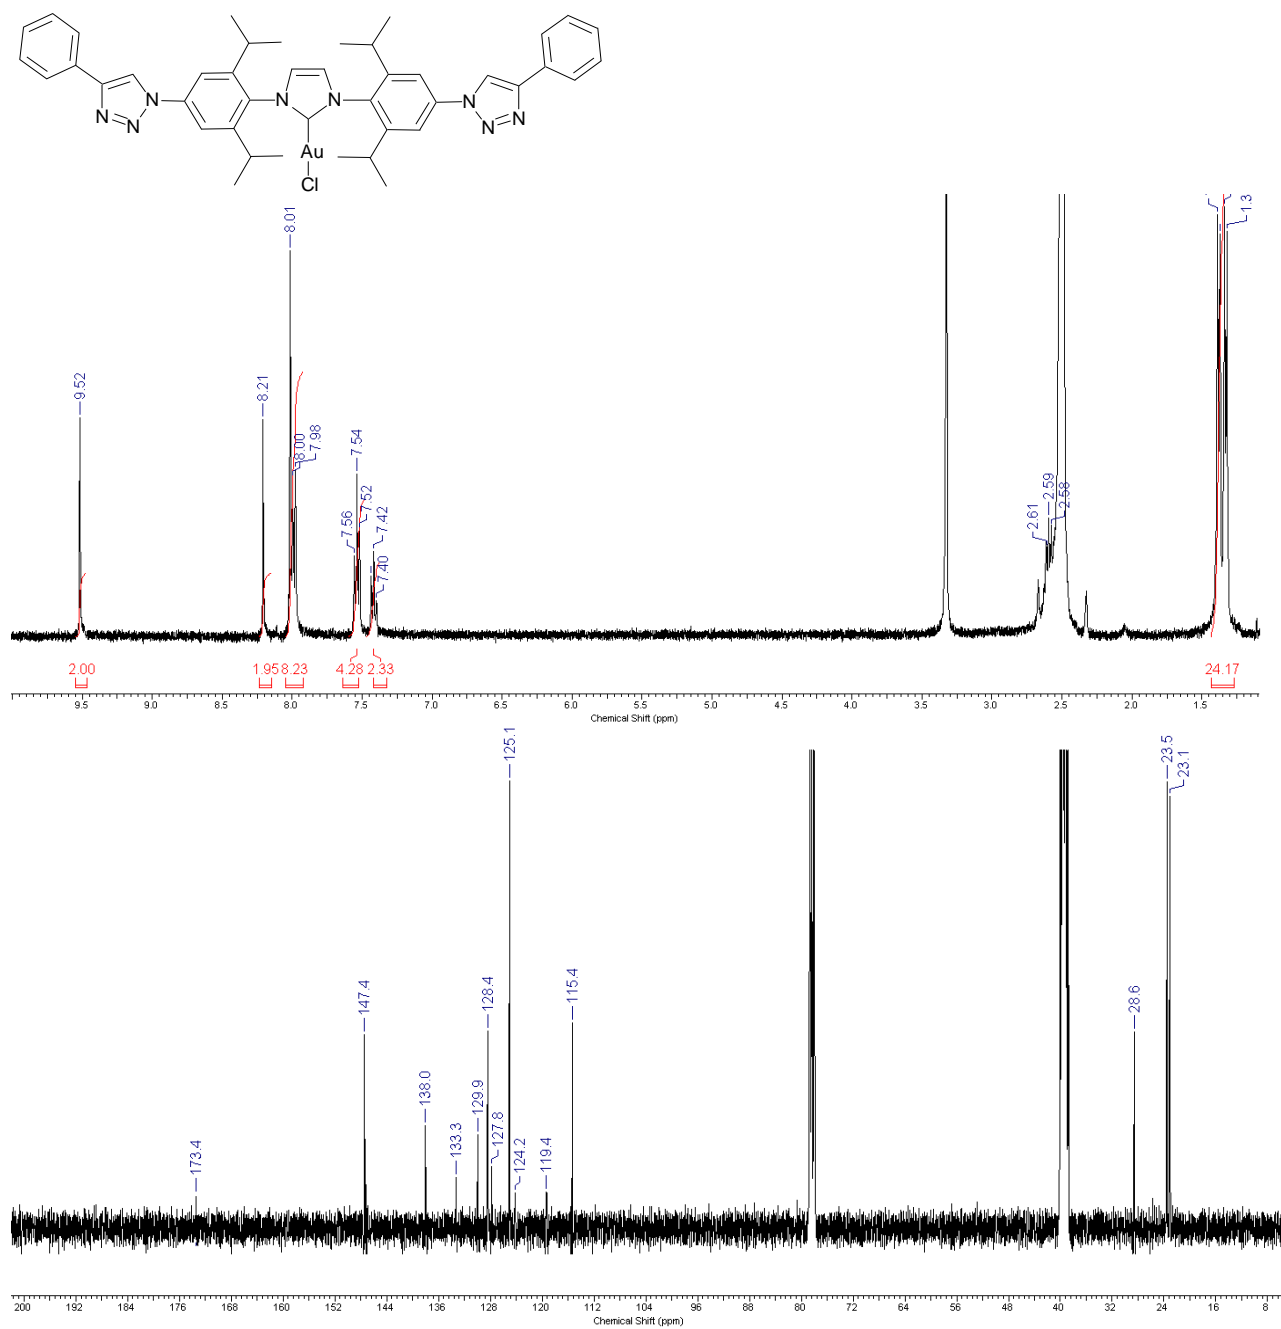

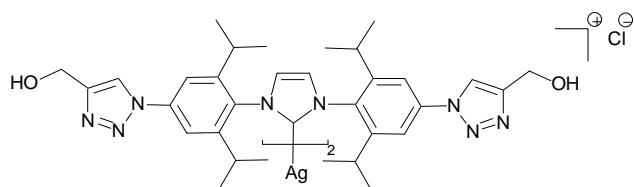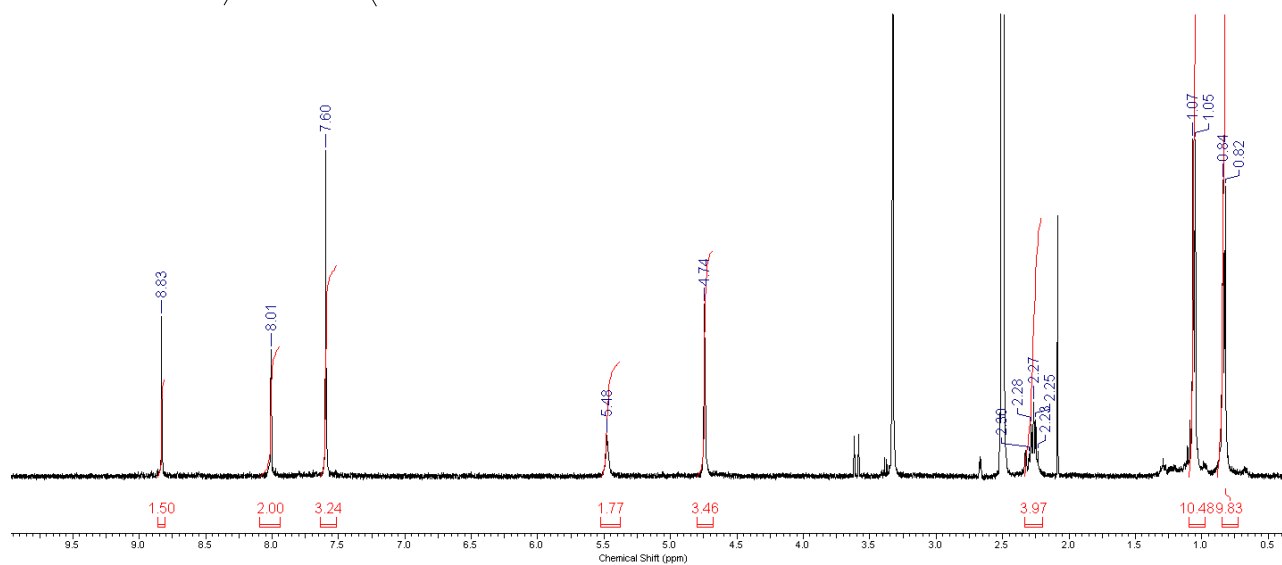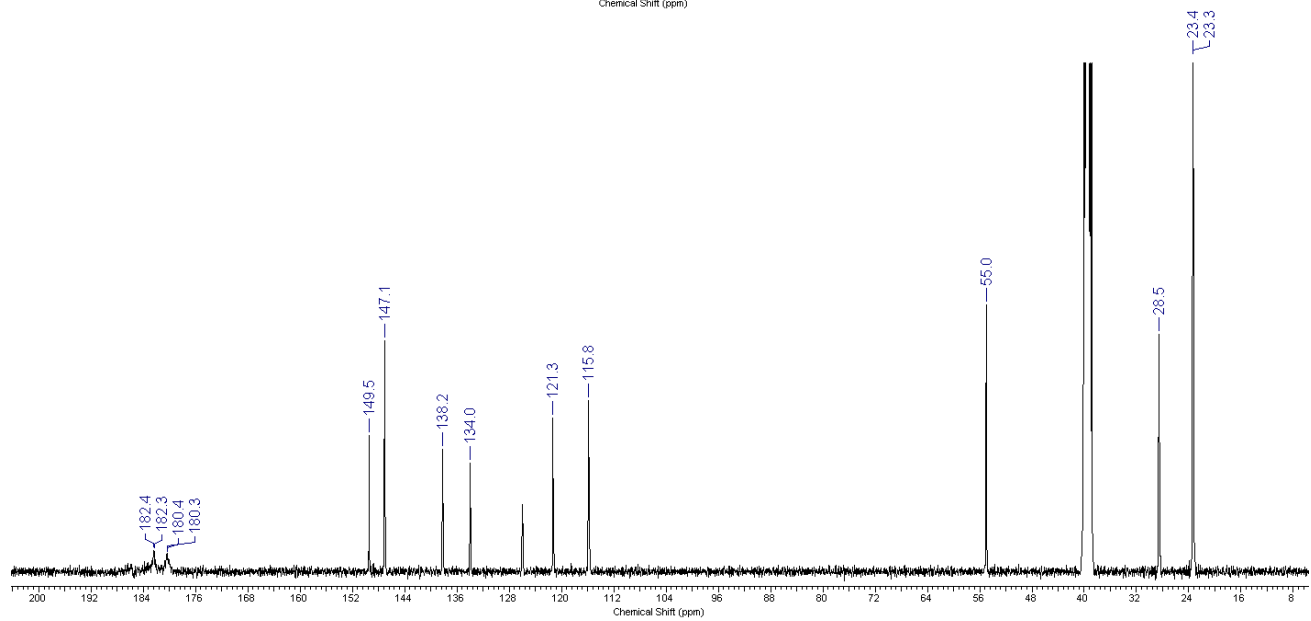

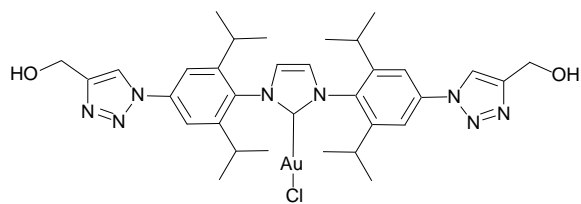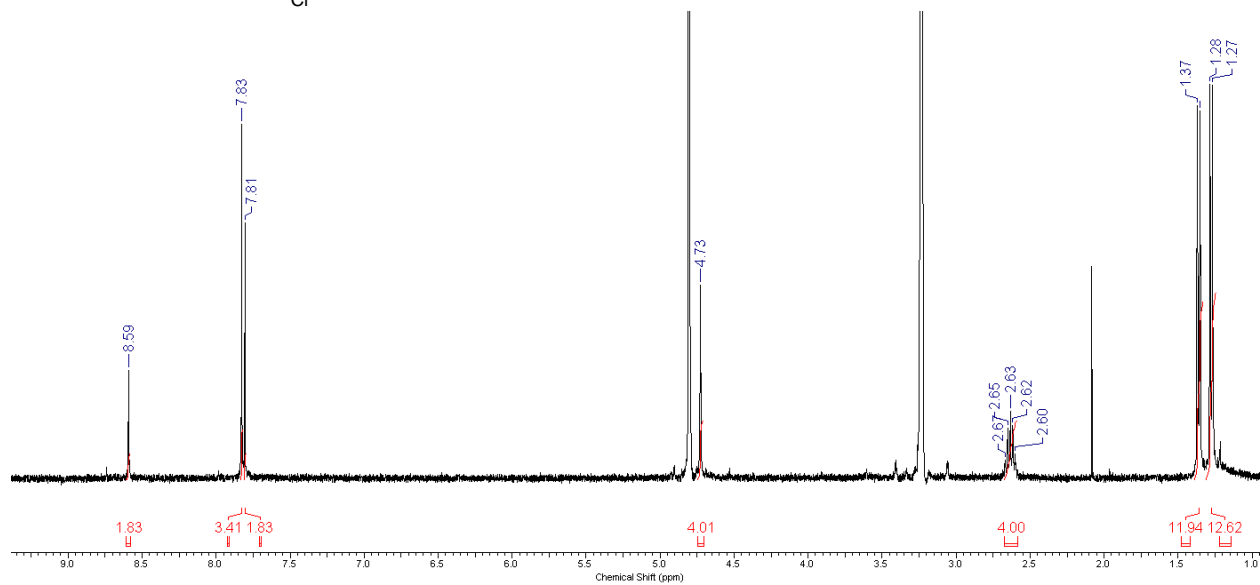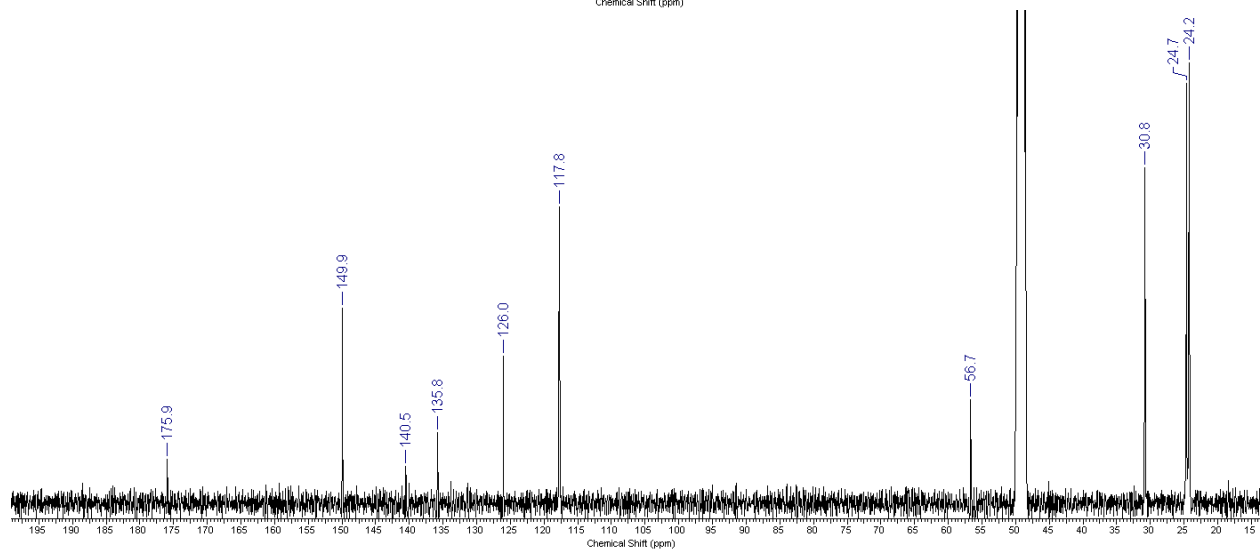

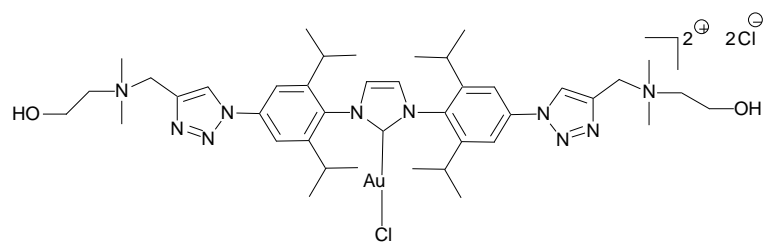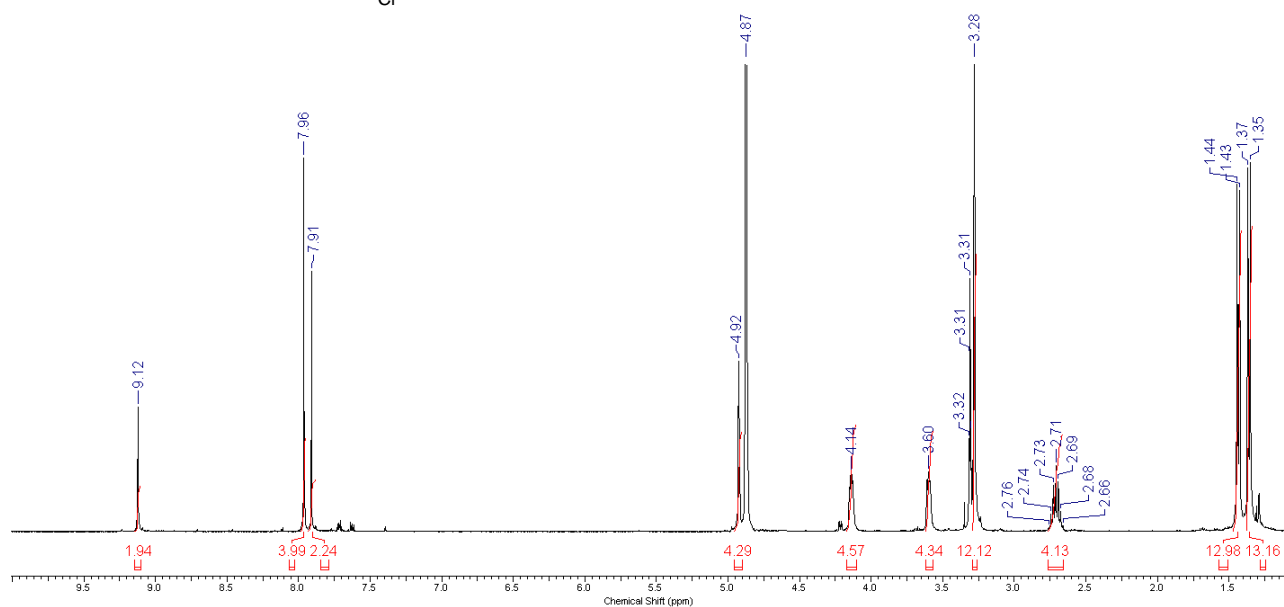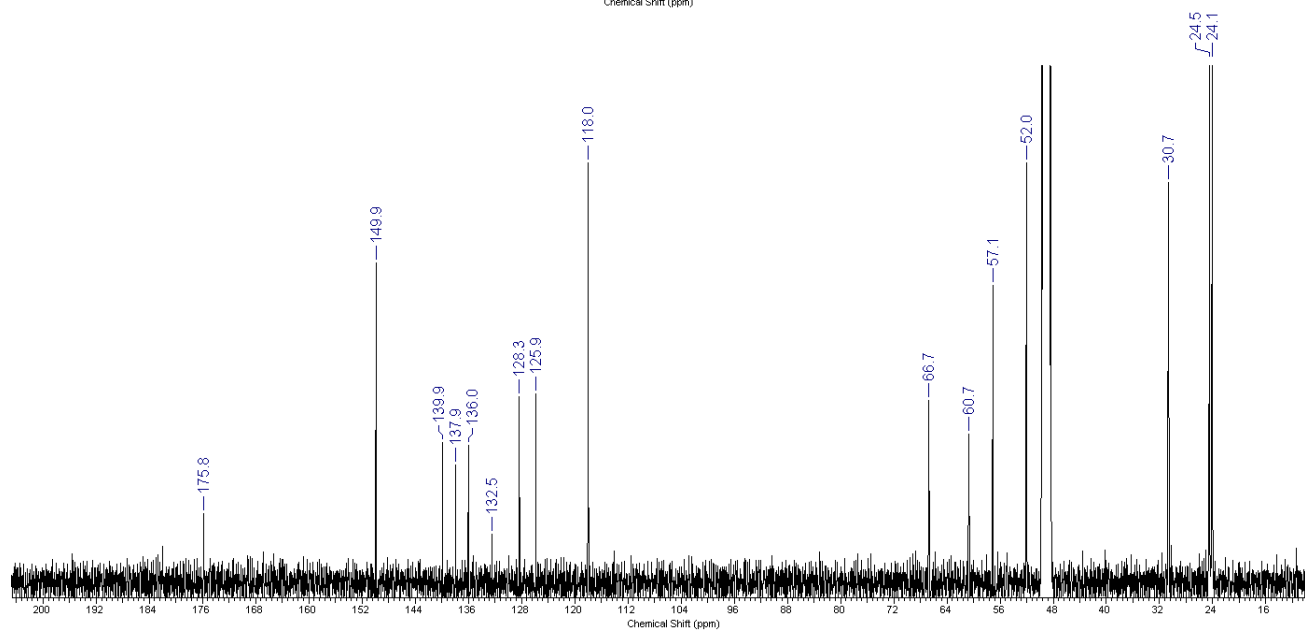

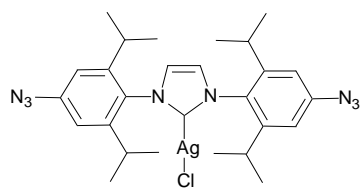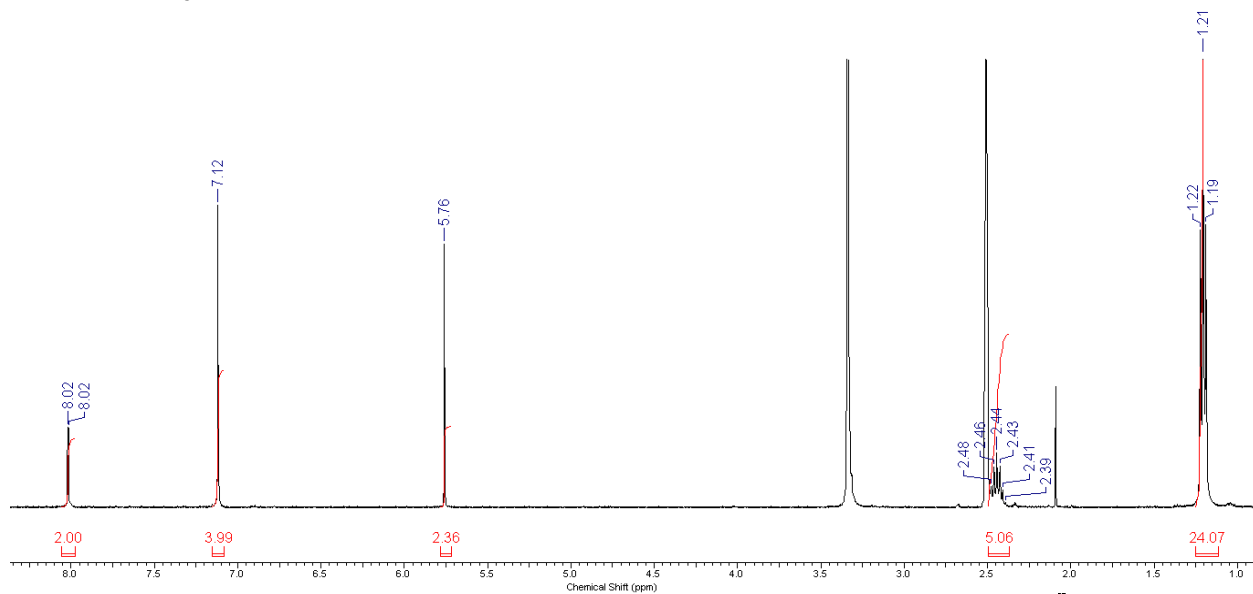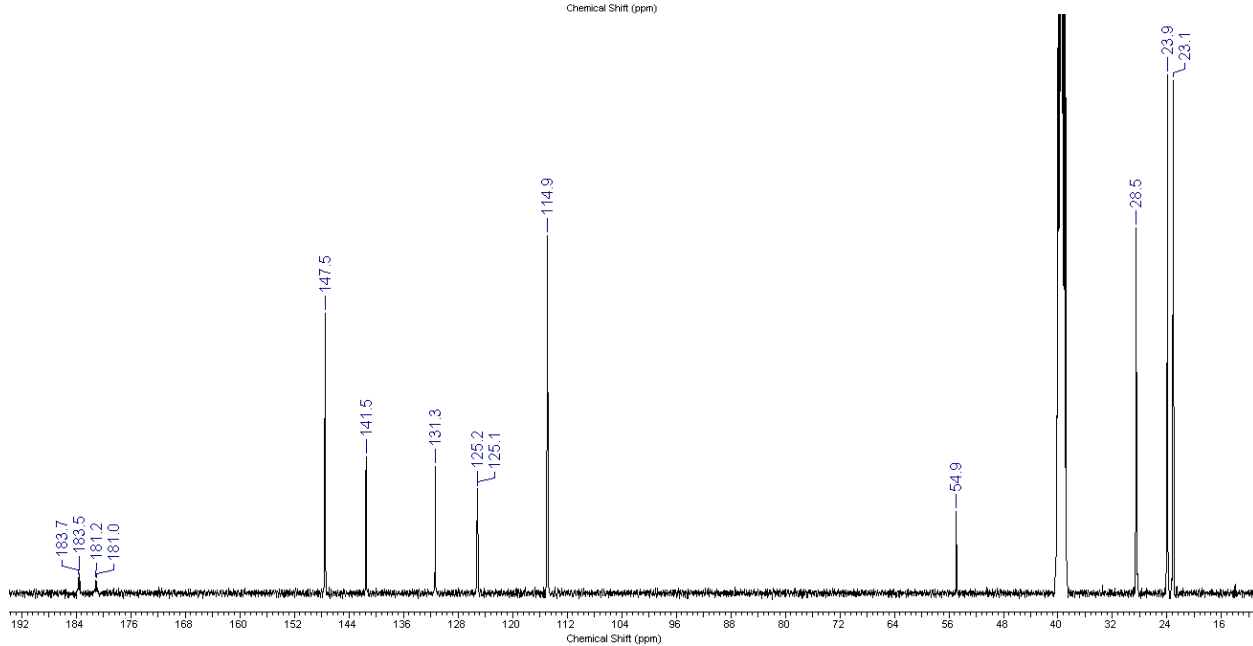



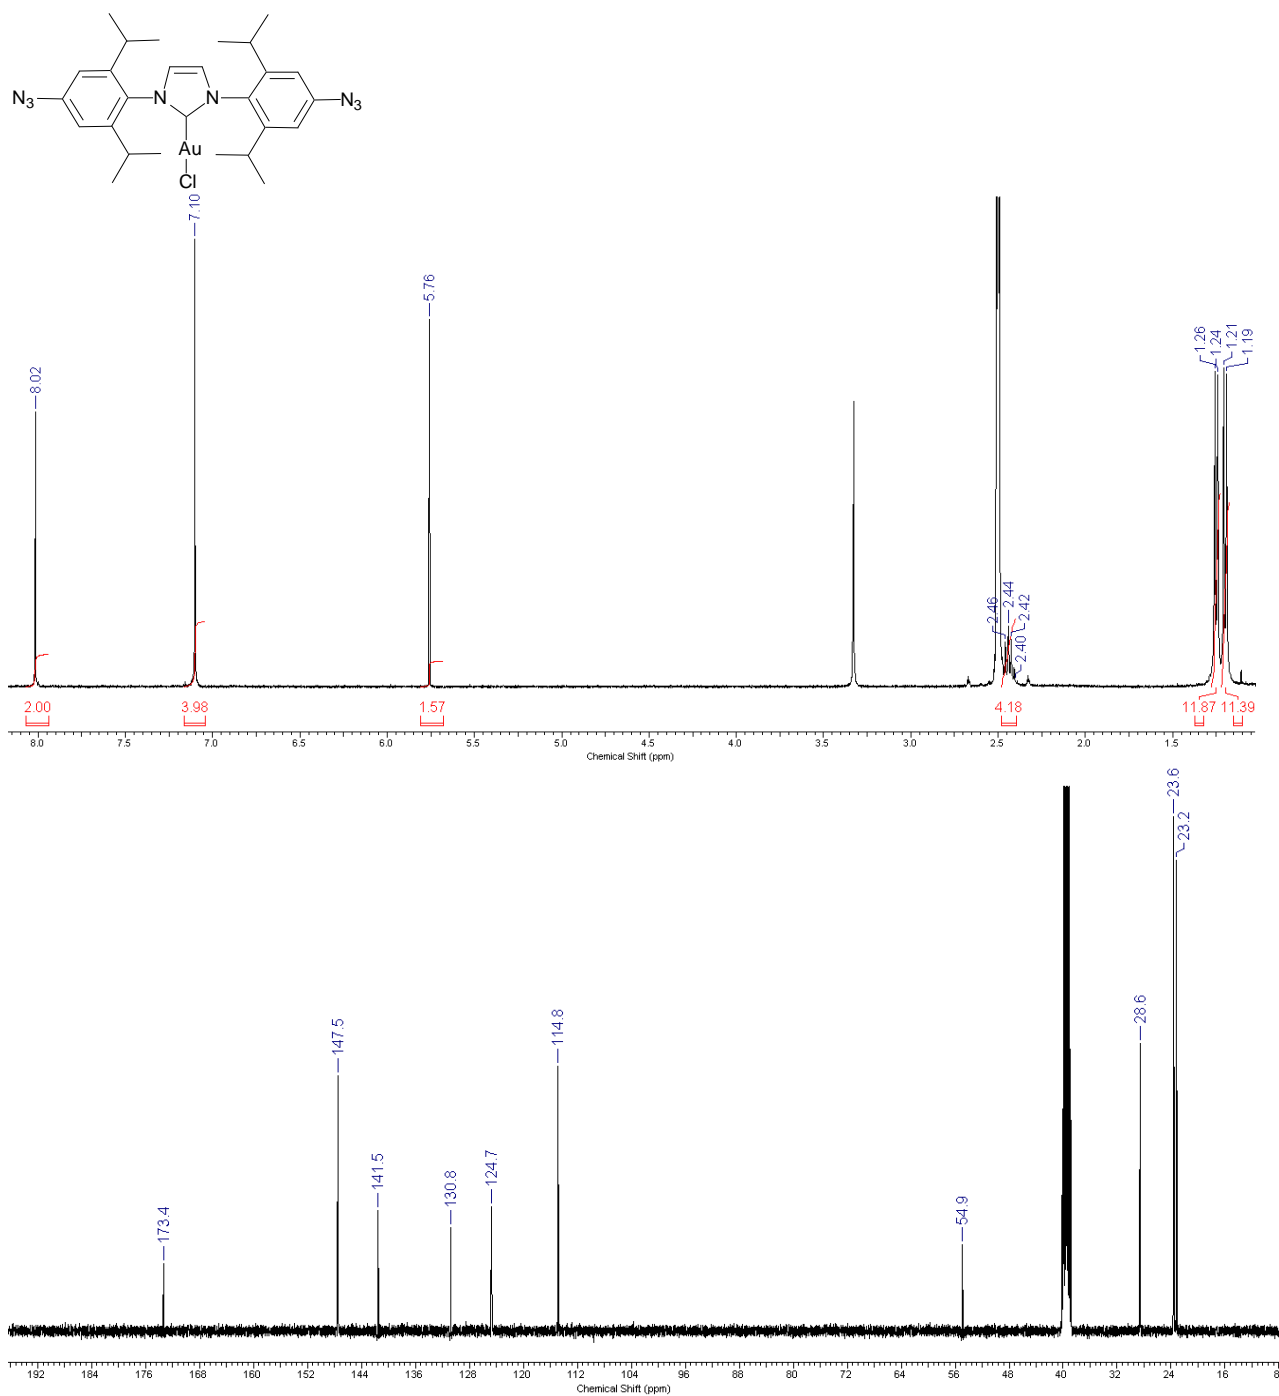

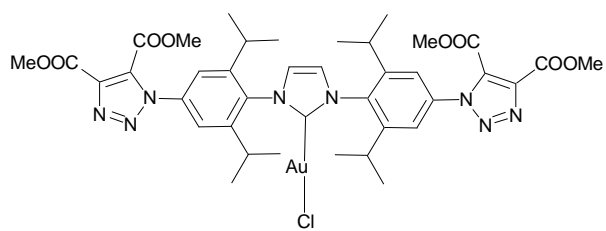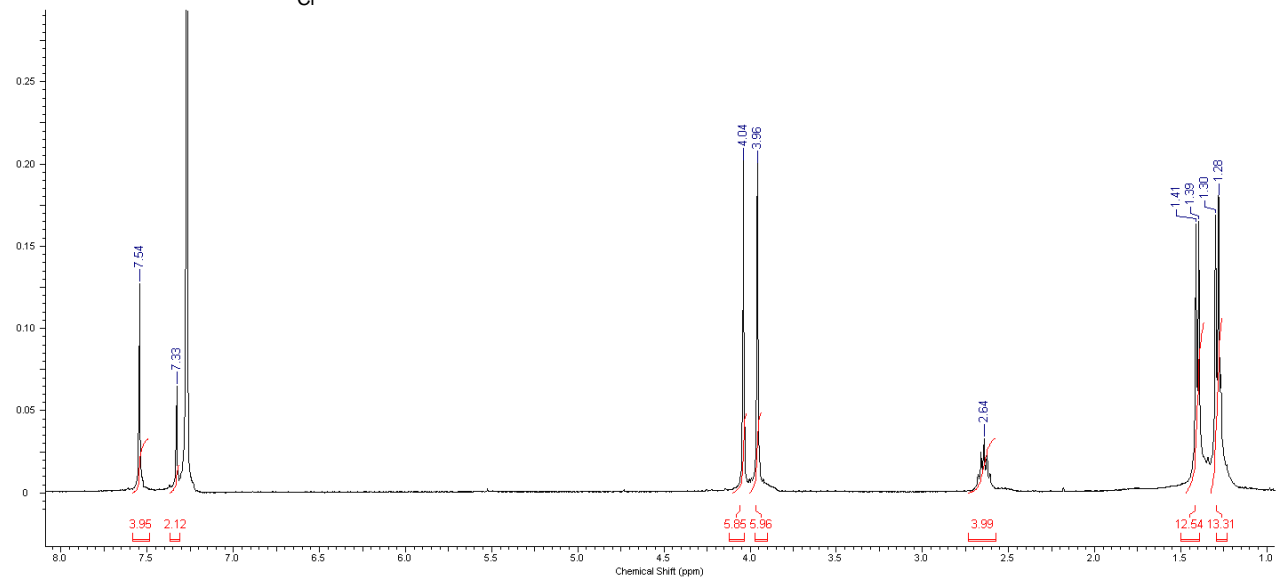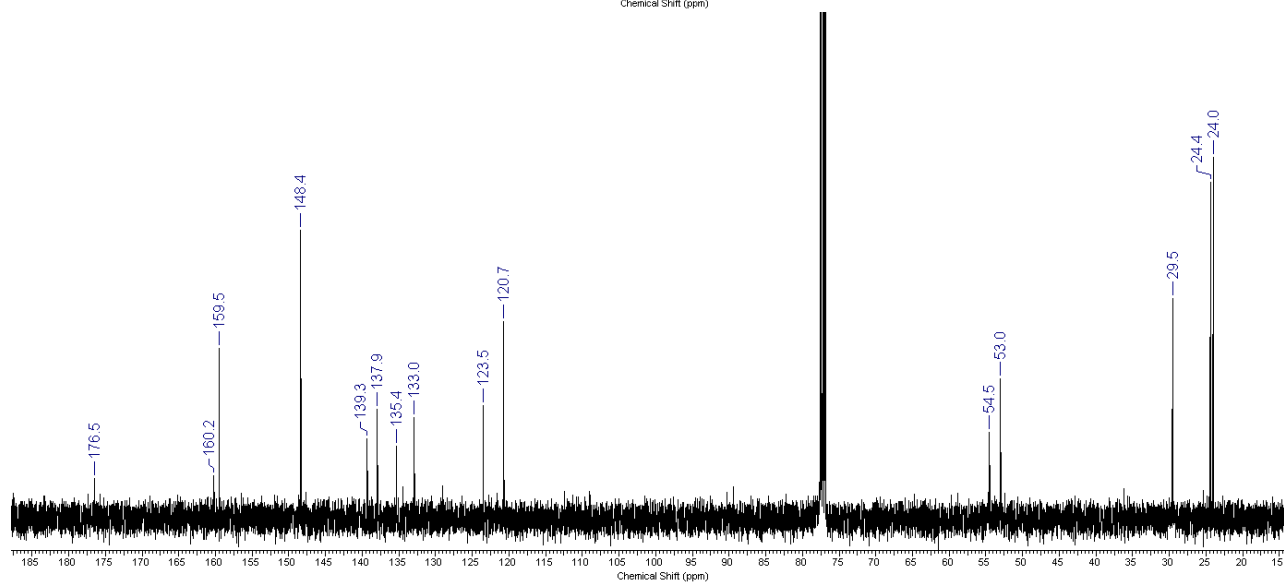

## S2b: $^1\text{H}$ , $^{13}\text{C}$ , COSY and HSQC spectra of cyclooctyne adducts.

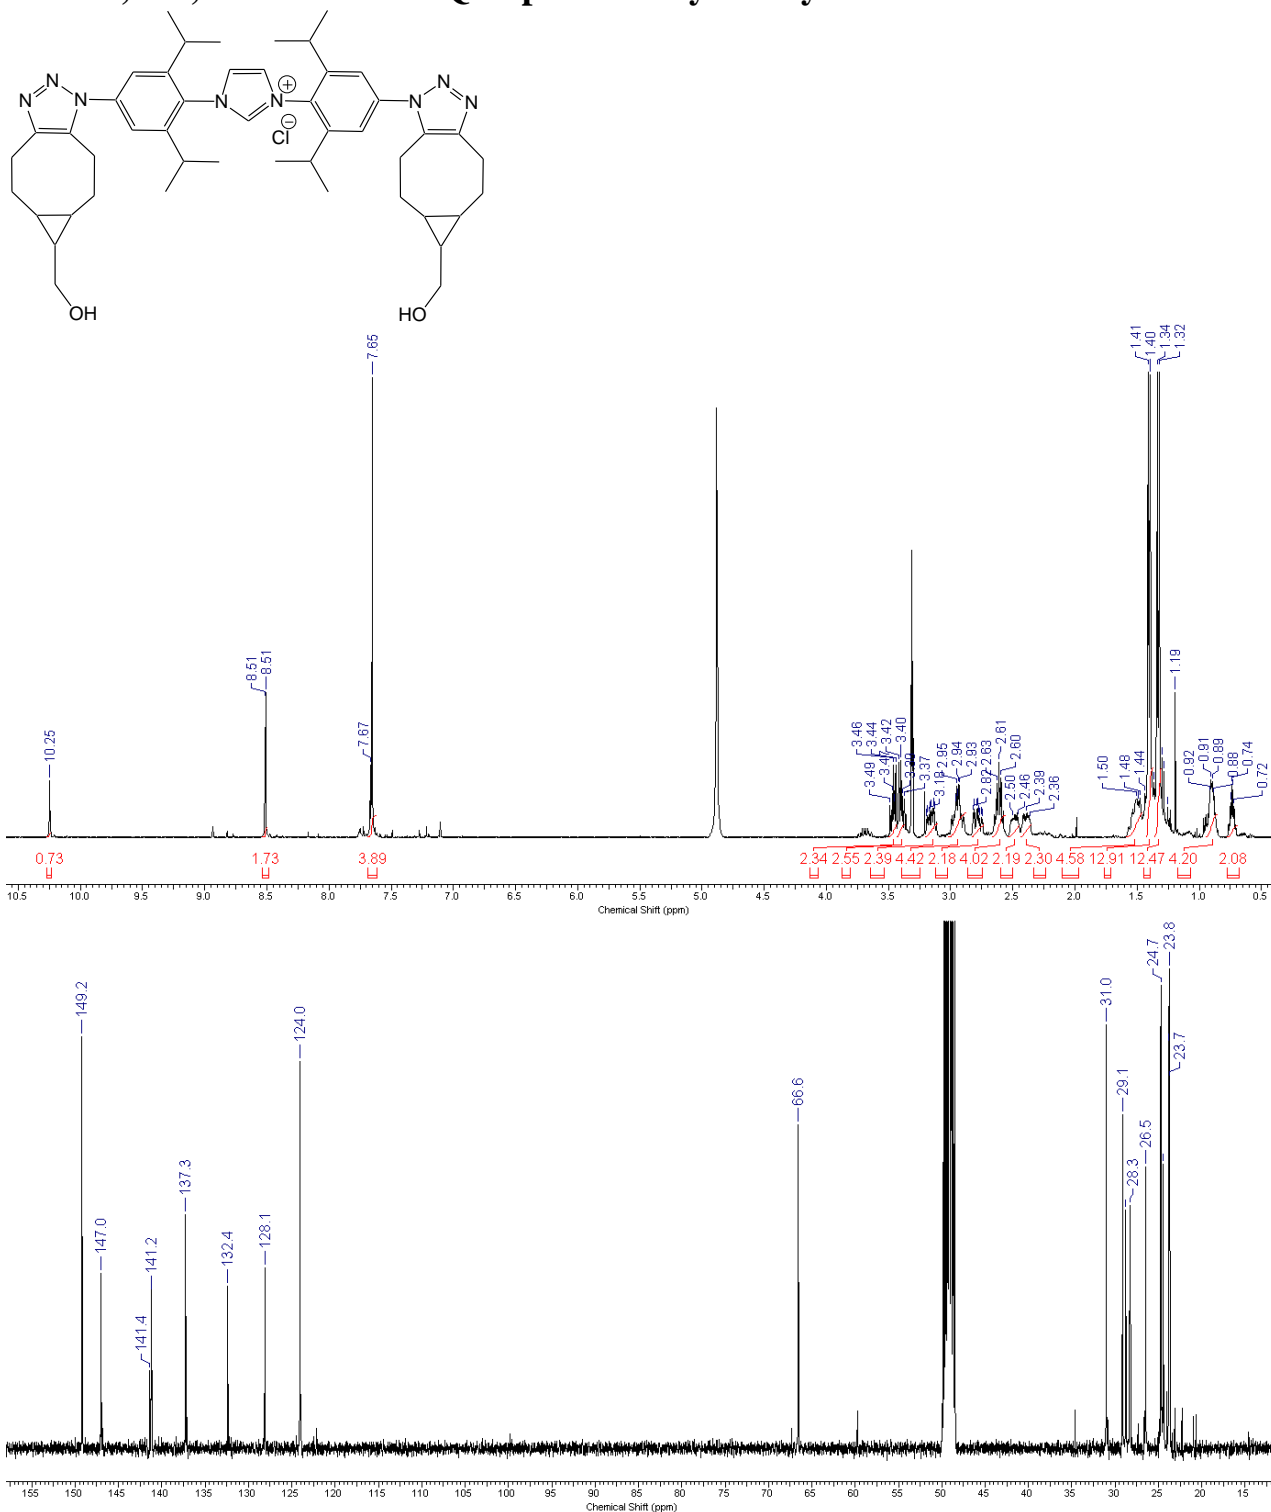

COSY spectrum (zoom on the aliphatic region)

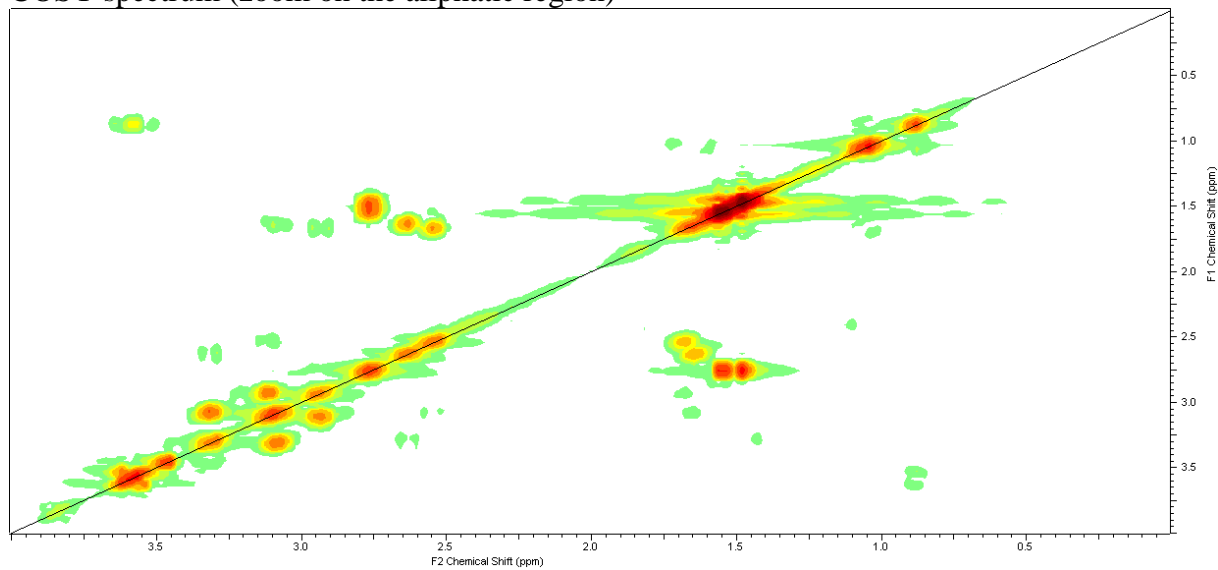

<sup>1</sup>H-<sup>13</sup>C HSQC spectrum

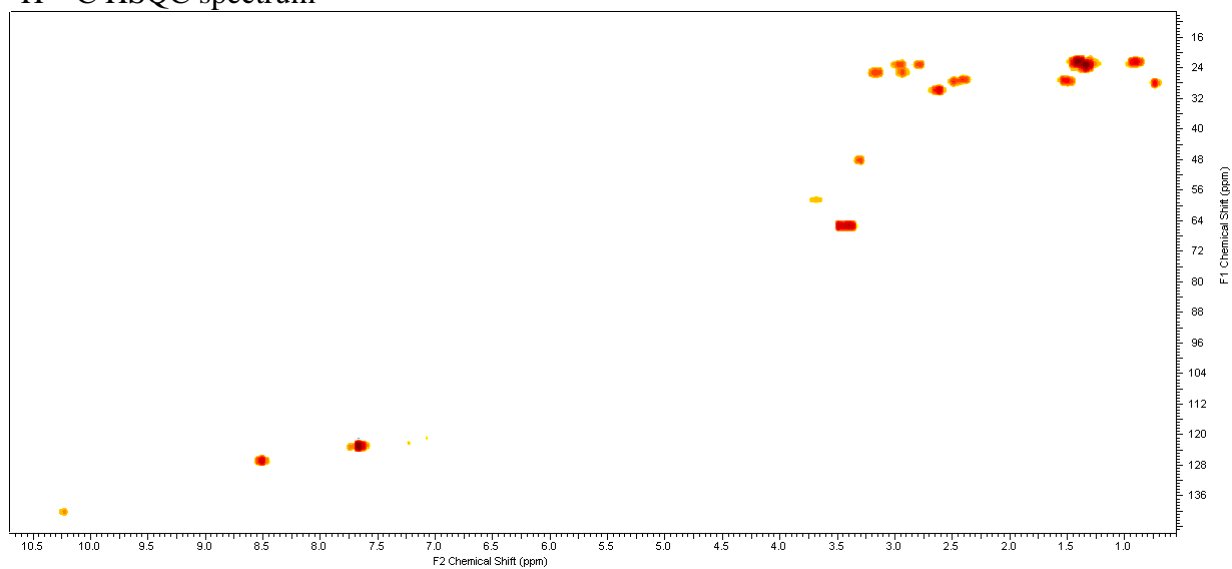

Table S1 – Partial NMR attribution (COSY, HSQC, JMOD) of **9**

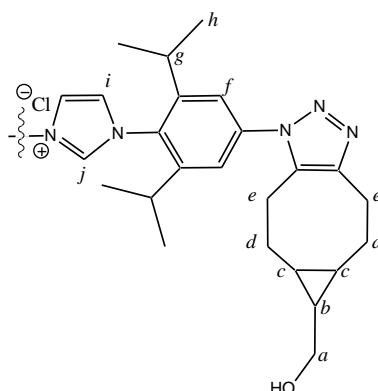

| position(s) | $^1\text{H NMR}$ ( $\delta$ / ppm)                                                                                                      | $^{13}\text{C NMR}$ ( $\delta$ / ppm) |
|-------------|-----------------------------------------------------------------------------------------------------------------------------------------|---------------------------------------|
| <i>a</i>    | 3.46 (dd, 2H, $^3J=7.0$ Hz, $^2J=11$ Hz) 3.40 (dd, 2H, $^3J=7.0$ Hz, $^2J=11$ Hz)                                                       | 66.6                                  |
| <i>b</i>    | 0.73 (m, 2H)                                                                                                                            | 29.1                                  |
| <i>c</i>    | 0.90 (m, 4H)                                                                                                                            | 23.7-23.8 (2 signals)*                |
| <i>d</i>    | 1.51 (m, 4H), 2.39 (m, 2H), 2.48 (m, 2H)                                                                                                | 28.8, 28.3                            |
| <i>e</i>    | 3.08 (ddd, 2H, $^3J=3.0$ Hz, $^3J=7.5$ Hz, $^2J=16.0$ Hz), 2.99-2.90 (m, 4H), 2.78 (ddd, 2H, $^3J=3.0$ Hz, $^3J=9.5$ Hz, $^2J=16.0$ Hz) | 26.5, 24.5                            |
| <i>f</i>    | 7.65 (s, 4H)                                                                                                                            | 124.0                                 |
| <i>g</i>    | 2.61 (hept, 4H, $^3J=7.0$ Hz)                                                                                                           | 31.0                                  |
| <i>h</i>    | 1.41 (d, $^3J=7.0$ Hz), 1.33 (d, $^3J=7.0$ Hz)                                                                                          | 24.74, 24.72, 23.7-23.8 (2 signals)*  |
| <i>i</i>    | 8.50 (d, 2H, $^4J=1.5$ Hz)                                                                                                              | 128.1                                 |
| <i>j</i>    | 10.24 (t, 1H, $^4J=1.5$ Hz)                                                                                                             | 141.2                                 |

\*4 signals are observed between in the spectrum 23.7 and 23.8 ppm

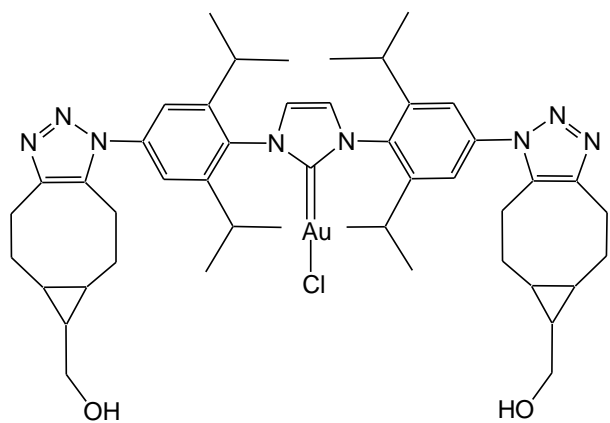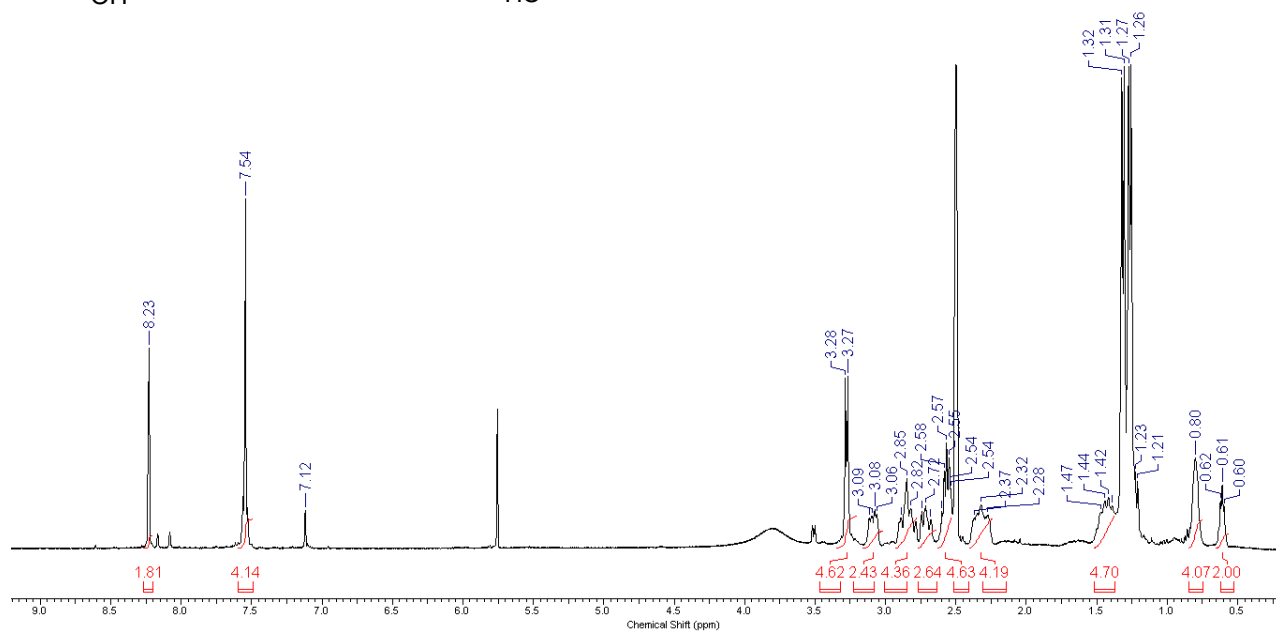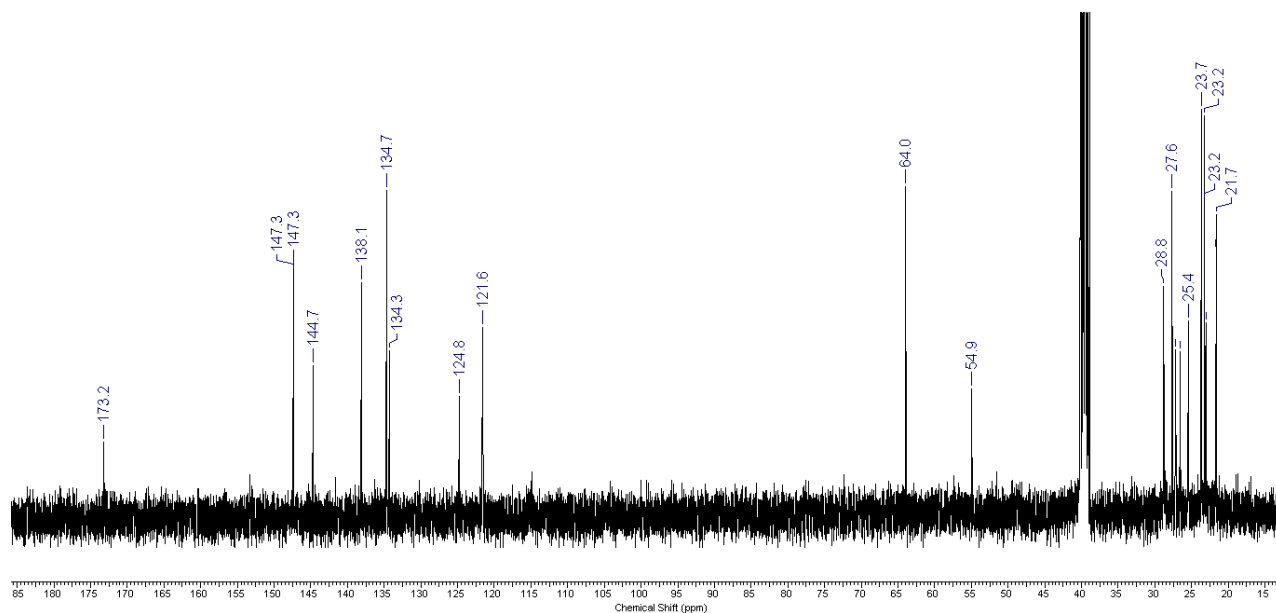

COSY spectrum (zoom on the aliphatic region)

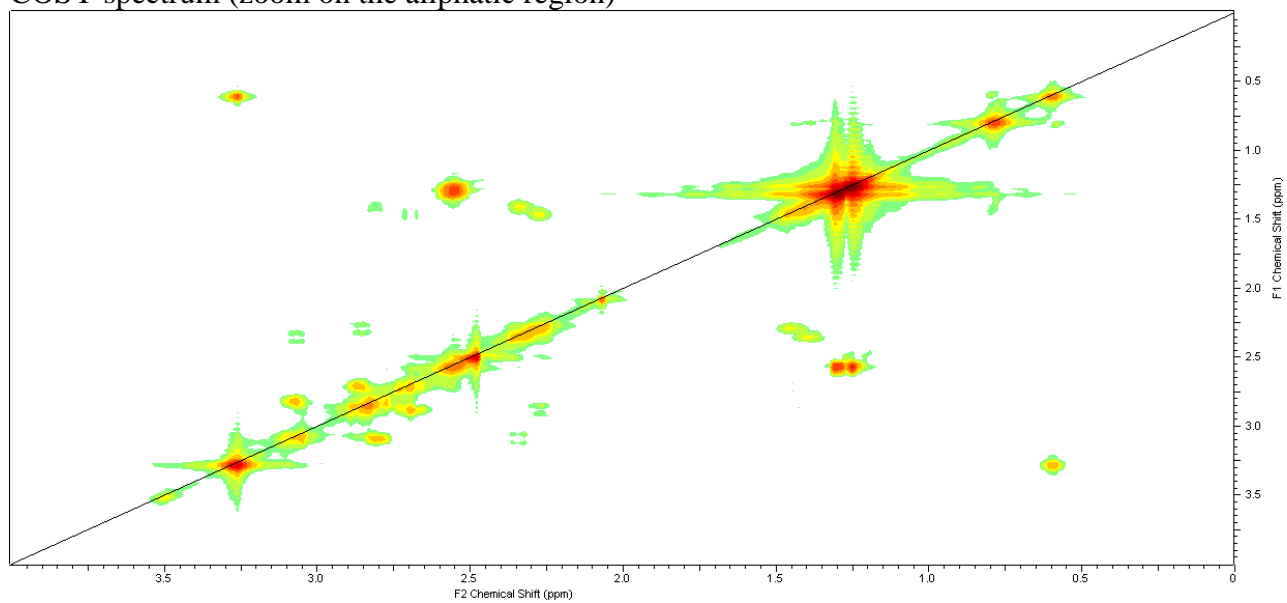

<sup>1</sup>H-<sup>13</sup>C HSQC spectrum

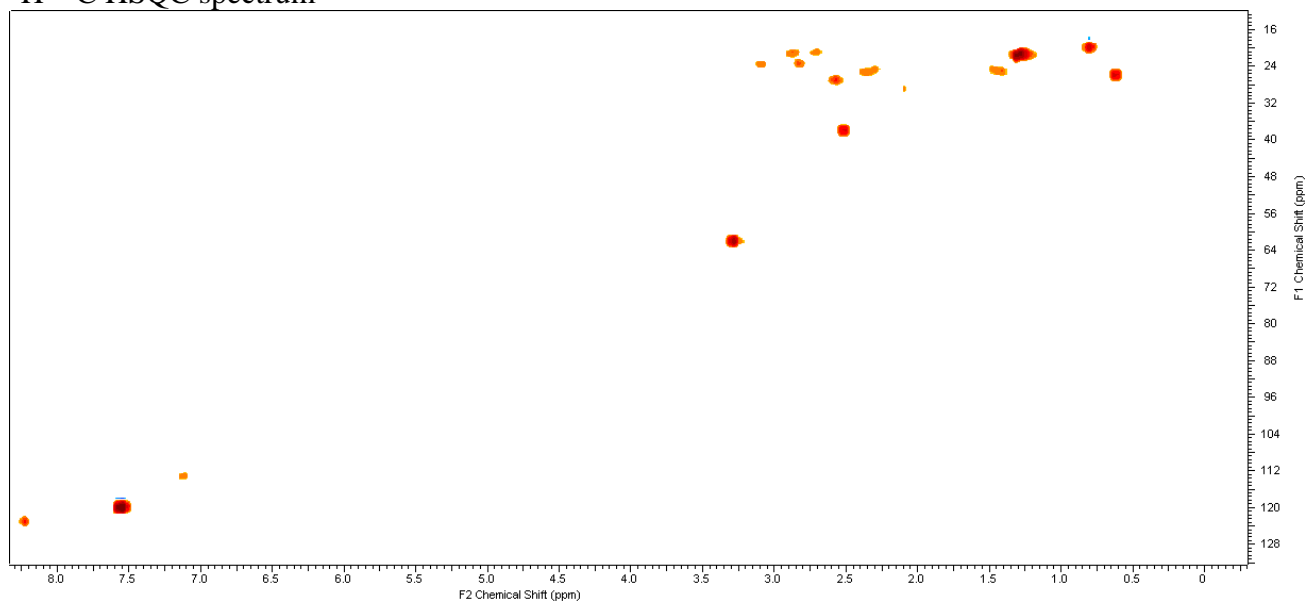

Table S2 – Partial NMR attribution (by COSY, HSQC and JMOD) of **24**

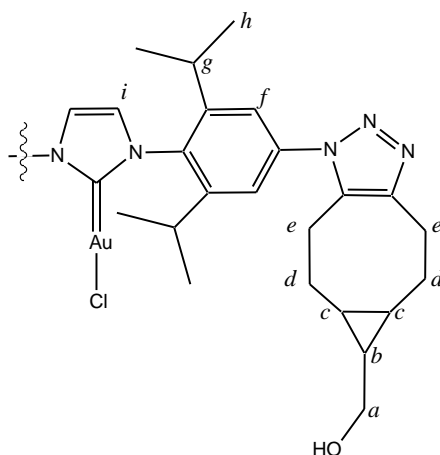

| position(s) | $^1\text{H}$ NMR ( $\delta$ / ppm)                                                                                                                   | $^{13}\text{C}$ NMR ( $\delta$ / ppm) |
|-------------|------------------------------------------------------------------------------------------------------------------------------------------------------|---------------------------------------|
| <i>a</i>    | 3.28 (d, 4H, $^3J = 6.5$ Hz)                                                                                                                         | 64.0                                  |
| <i>b</i>    | 0.60 (m, 2H)                                                                                                                                         | 27.6                                  |
| <i>c</i>    | 0.76-0.83 (m, 4H)                                                                                                                                    | 21.72, 21.66                          |
| <i>d</i>    | 1.37-1.51 (m, 4H), 2.35 (m, 2H), 2.29 (m, 2H)                                                                                                        | 26.6, 27.2                            |
| <i>e</i>    | 3.08 (ddd, 2H, $^3J = 2.5$ Hz, $^3J = 7.5$ Hz, $^2J = 15.5$ Hz), 2.91-2.78 (m, 4H), 2.71 (ddd, 2H, $^3J = 3.0$ Hz, $^3J = 10.0$ Hz, $^2J = 15.5$ Hz) | 23.1, 25.4                            |
| <i>f</i>    | 7.54 (s, 4H)                                                                                                                                         | 121.6                                 |
| <i>g</i>    | 2.56 (hept, 4H, $^3J = 7.0$ Hz)                                                                                                                      | 28.8                                  |
| <i>h</i>    | 1.32 (d, $^3J = 7.0$ Hz), 1.27 (d, $^3J = 7.0$ Hz)                                                                                                   | 23.69, 23.66, 23.24, 23.20            |
| <i>i</i>    | 8.22 (s, 2H)                                                                                                                                         | 124.8                                 |



### S3: Representation of the calculated transition states.

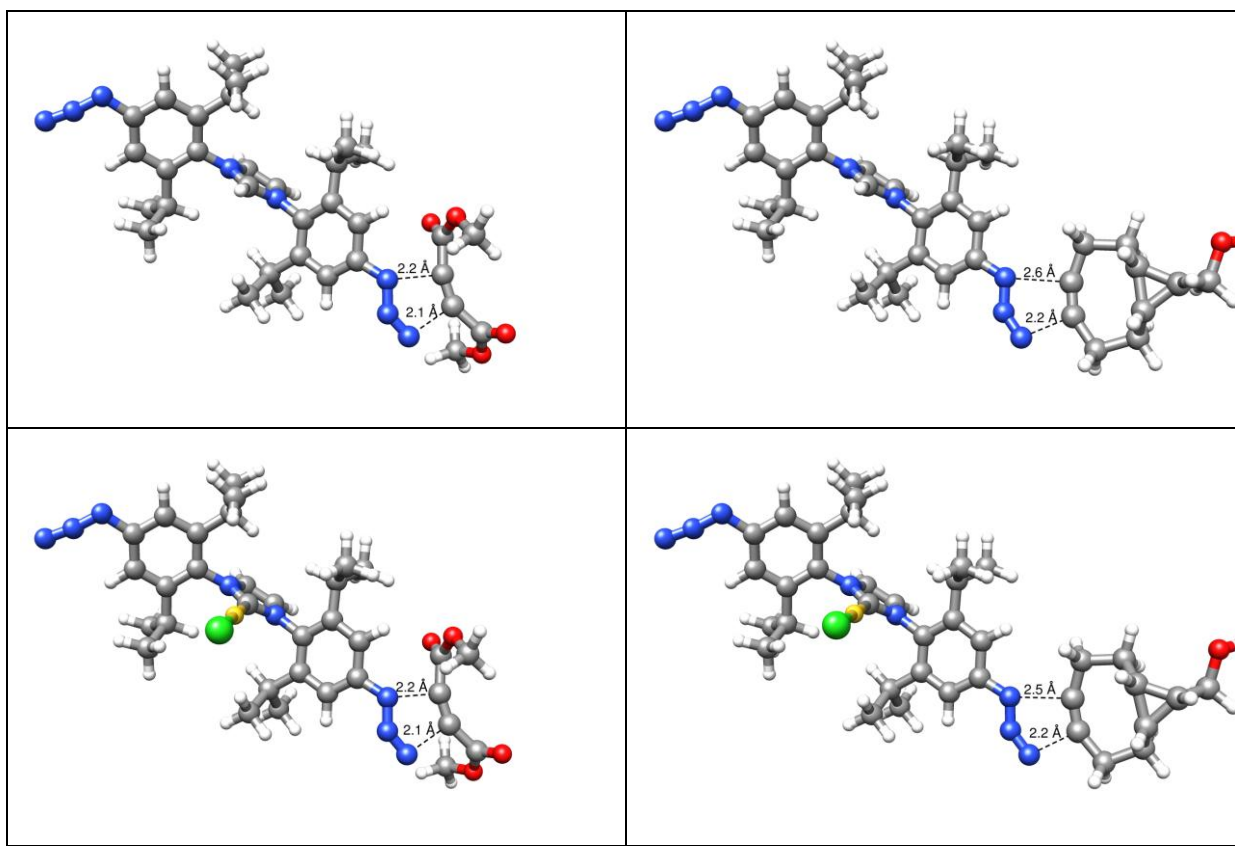

Supplement: c2dt30249g.pdf [file c2dt30249g.pdf]
